# Supplementary material for: High Occurrence of Zoonotic Subtypes of Cryptosporidiumparvum in Cypriot Dairy Farms
Source: MDPI journal article supplement (doi:10.3390/microorganisms10030531), 2022-02-28
Supplement: s1 [file s1]

# High Occurrence of Zoonotic Subtypes of *Cryptosporidium parvum* in Cypriot Dairy Farms

## Supplementary Materials

**Table S1.** Age range of sampled cows in each farm.

| Farm | Age Range (Known Samples Only) |
|------|--------------------------------|
| 1    | 0–2 years                      |
| 2    | 9–98 days                      |
| 3    | Pre-weaned                     |
| 4    | 27–73 days                     |
| 5    | 8–11 months                    |
| 6    | Pre-weaned                     |
| 7    | 1–3 months                     |
| 8    | Pre-weaned                     |
| 9    | Pre-weaned                     |
| 10   | Pre-weaned                     |

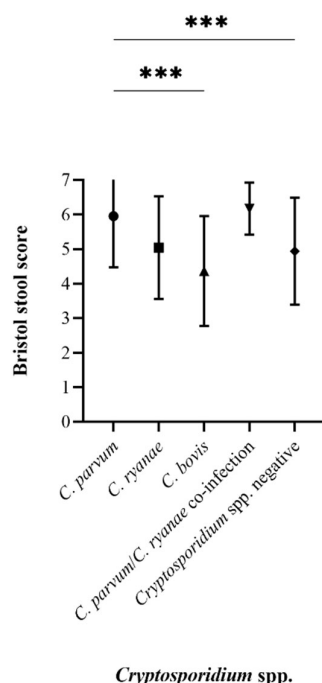

**Figure S1.** Bristol stool score ranges for the *Cryptosporidium* spp. identified in this study. Mean stool score for each species indicated by symbol - samples positive for *C. parvum* (●), *C. ryanae* (■), *C. bovis* (▲), *C. parvum/C. ryanae* co-infection (▼), and *Cryptosporidium*-negative samples (◆). Higher scores indicate softer, watery stools. Asterisks indicate statistically significant (Kruskal-Wallis analysis of variance with Dunn's pairwise comparisons test) differences in stool score between *Cryptosporidium* spp. Stool score for samples positive for *C. parvum* were significantly ( $p < 0.001$ ) higher than samples positive for *C. bovis* and *Cryptosporidium*-negative samples. No other differences were statistically significant.

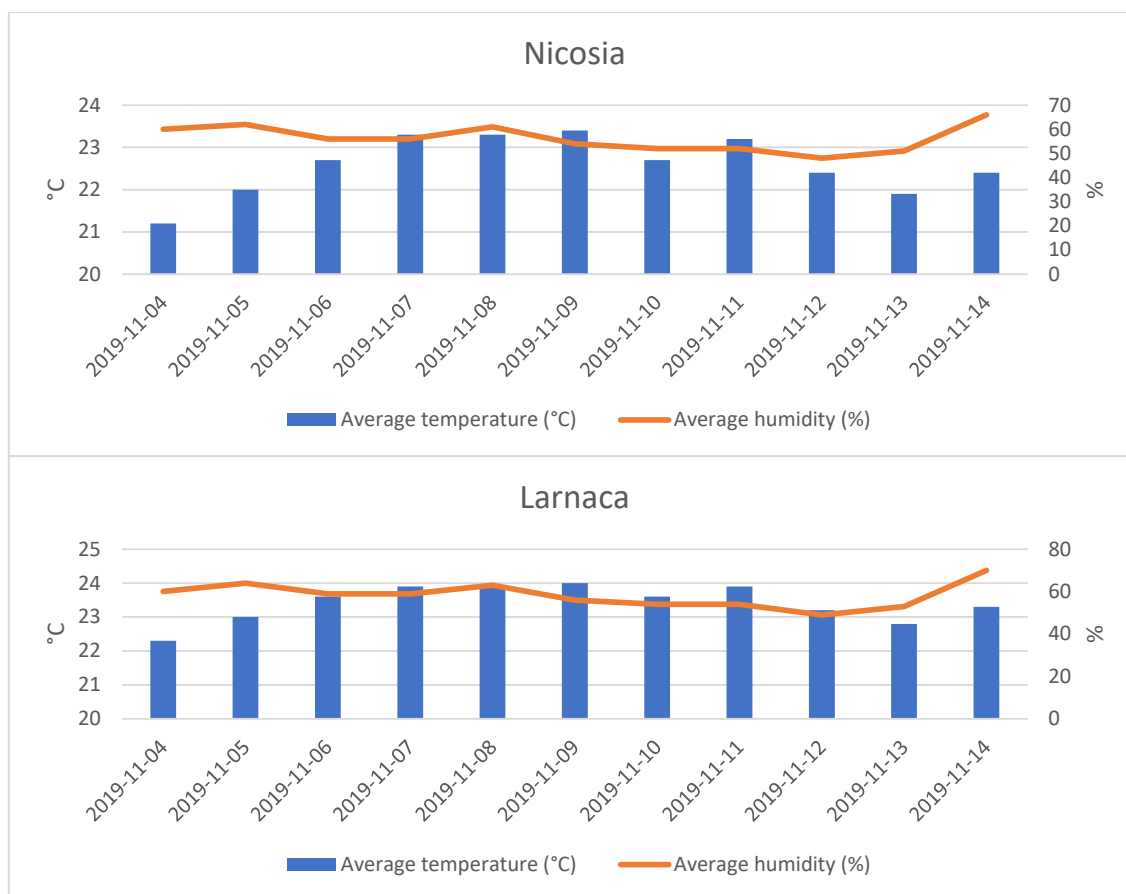

**Figure S2.** Meteorological report on Nicosia and Larnaca, indicating average temperature and rain-fall in these regions during the sampling period. Stool samples were collected on the 7<sup>th</sup>, 8<sup>th</sup> and 14<sup>th</sup> of November 2019.
